# Supplementary material for: The syndrome of central hypothyroidism and macroorchidism: IGSF1 controls TRHR and FSHB expression by differential modulation of pituitary TGFβ and Activin pathways
Source: PubMed Central journal article supplement (PMC5338029; doi:10.1038/srep42937), 2017-03-06
Supplement: srep42937-s1.pdf [file srep42937-s1.pdf]

## SUPPLEMENTAL INFORMATION

### The syndrome of central hypothyroidism and macroorchidism: IGSF1 controls *TRHR* and *FSHB* expression by differential modulation of pituitary TGF $\beta$ and Activin pathways

Marta García <sup>1</sup>, Raquel Barrio <sup>2</sup>, Montserrat García-Lavandeira <sup>3</sup>, Angela R. Garcia-Rendueles <sup>3</sup>, Adela Escudero <sup>1</sup>, Esther Díaz-Rodríguez <sup>3</sup>, Darya Gorbenko Del Blanco <sup>4</sup>, Ana Fernández <sup>1</sup>, Yolanda B de Rijke <sup>5</sup>, Elena Vallespín <sup>6</sup>, Julián Nevado <sup>6</sup>, Pablo Lapunzina <sup>6</sup>, Vilborg Matre <sup>7</sup>, Patricia M. Hinkle <sup>8</sup>, Anita C.S. Hokken-Koelega <sup>4</sup>, María P. de Miguel <sup>9</sup>, José Manuel Cameselle-Teijeiro <sup>10</sup>, Manuel Nistal <sup>11</sup>, Clara V. Alvarez <sup>3\*</sup>, José C. Moreno <sup>1\*</sup>.

<sup>1</sup> Thyroid Molecular Laboratory, Institute for Medical and Molecular Genetics (INGEMM), La Paz University Hospital, Autonomous University of Madrid, Spain.

<sup>2</sup> Pediatric Endocrinology and Diabetes, Ramón y Cajal University Hospital, Madrid, Spain.

<sup>3</sup> Centro de Investigación en Medicina Molecular y Enfermedades Crónicas (CIMUS), University of Santiago de Compostela, Instituto de Investigación Sanitaria (IDIS), Santiago de Compostela, Spain.

<sup>4</sup> Department of Pediatrics, subdivision of Endocrinology, Erasmus Medical Center, Rotterdam, The Netherlands.

<sup>5</sup> Department of Clinical Chemistry, Erasmus Medical Center, Rotterdam, The Netherlands.

<sup>6</sup> Functional and Structural Genomics, Institute for Medical and Molecular Genetics (INGEMM), La Paz University Hospital, Madrid, Spain.

<sup>7</sup> Department of Biosciences, University of Oslo, Oslo, Norway.

<sup>8</sup> Department of Pharmacology and Physiology, University of Rochester Medical Center Rochester, NY, USA.

<sup>9</sup> Cell Engineering Laboratory, La Paz Hospital Research Institute IdiPAZ, Madrid, Spain

<sup>10</sup> Department of Anatomic Pathology, Medical Faculty, University of Santiago de Compostela, Clinical University Hospital, Santiago de Compostela, Spain.

<sup>11</sup> Department of Anatomy, Histology and Neuroscience, Autonomous University of Madrid, Madrid, Spain.

\* Corresponding authors:

José C. Moreno, MD, PhD  
Thyroid Molecular Laboratory. Institute for Medical and Molecular Genetics (INGEMM)  
La Paz University Hospital, Paseo de la Castellana, 261  
ES-28046 Madrid (Spain)  
E-mail: josecarlos.moreno@salud.madrid.org  
Tel: +34 912071010 (ext. 224)

Clara V. Alvarez, MD, PhD  
Neoplasia & Endocrine Differentiation (P0L5)  
Centro de Investigación en Medicina Molecular y Enfermedades Crónicas (CIMUS)  
University of Santiago de Compostela (Spain)  
E-mail: [clara.alvarez@usc.es](mailto:clara.alvarez@usc.es)

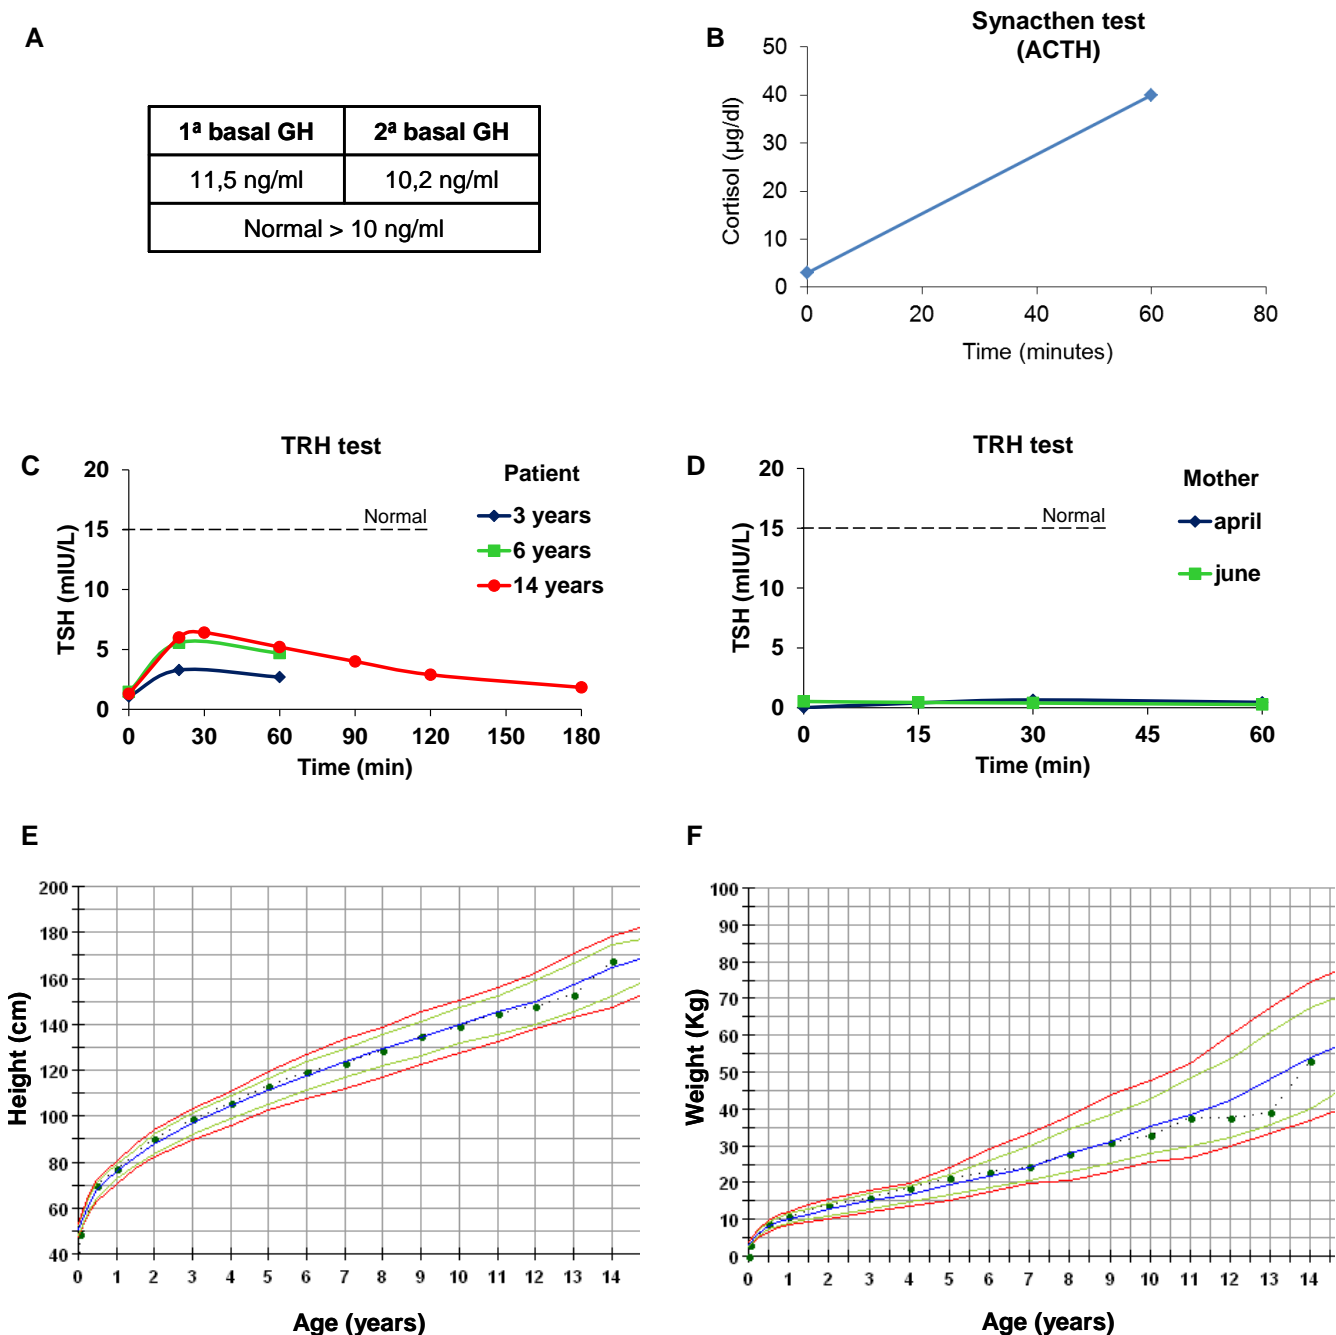

**Supplemental Figure 1: Pituitary response at different stimulation tests and growth charts of the patient with IGSF1 deletion.** **A)** At initial diagnosis of the patient, and to rule out a possible combined pituitary hormone deficiency (CPHD), serum basal growth hormone (GH) was determined in two occasions showing normal values. **B)** a Synacthen<sup>®</sup> (ACTH) stimulation test was performed as neonate (15 days of life) with normal results (peak >20 µg/dl), discarding cortisol deficiency. **C)** TRH stimulation tests at 3, 6 and 14 years of age showed a mild improvement in the TSH peak response to TRH along with age. A similar improvement has been described in one patient with congenital central hypothyroidism (15) and could be related to the repeated exposure of the pituitary to TRH at previous tests (Beck-Peccoz P, Amr S, Menezes-Ferreira MM, Faglia G, Weintraub BD. Decreased receptor binding of biologically inactive thyrotropin in central hypothyroidism. Effect of treatment with thyrotropin-releasing hormone. *N Engl J Med.* 1985; 312(17):1085- 90). **D)** Repeated (two) TRH stimulation tests in the mother of the patient at 36 years of age, showed a flat TSH response to TRH, consistent with a pituitary defect not related to L-T4 treatment. **E-F)** Height and weight charts of the patient showing normal growth within the 50th percentile in both curves, further ruling out GH deficiency. A physiological and transient deceleration of height and weight is observed during peri-pubertal stages. Adult height at 20 years of age reached 175 cm, which is actually higher than his calculated target-height of 169 cm.



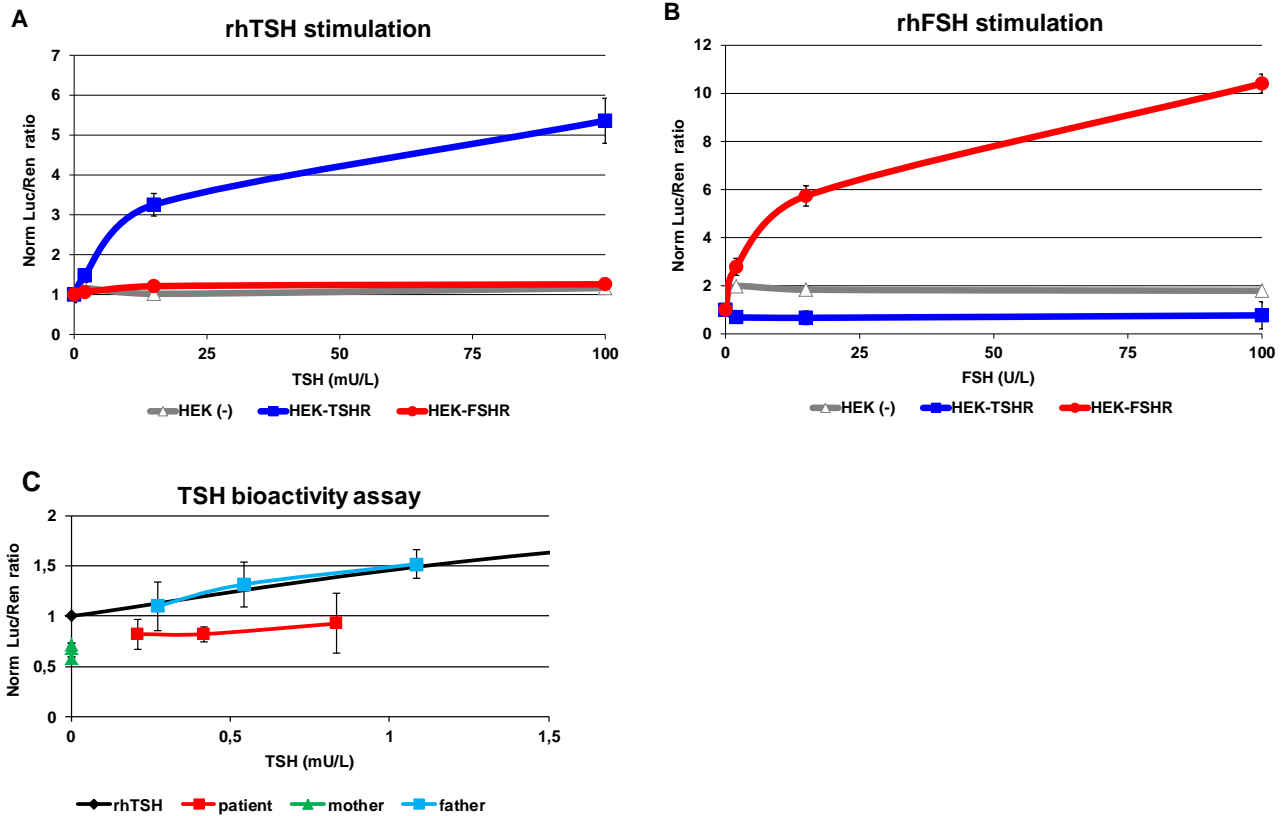

**Supplemental Figure 3: Glycoprotein hormone cross-reactivity test in TSH- and FSH-bioactivity assays and TSH bioactivity of patient with IGSF1 deletion.** Bioactivity of the recombinant TSH (A) and FSH (B) in untransfected HEK293 cells (grey lines) and cells transfected with either TSHR cDNA (blue lines) or FSHR cDNA (red lines). Stimulation of the TSHR by recombinant human TSH (rhTSH) is specific, without any cross-reactive stimulation of the FSHR (A). Similarly, stimulation of the FSHR by recombinant human FSH (rhFSH) is also specific, without detectable cross-reactive stimulation of the TSHR (B). TSH bioactivity of the sera from the mother and father as compared to the patient, showed a decreased bioactivity in patient and his mother (heterozygous carrier of IGSF1 deletion), whereas the father (without IGSF1 deletion) presented normal TSH bioactivity (C). Three different dilutions of the human sera are shown per condition (1:2, 1:4, 1:8). expressed as normalized firefly luciferase activities to the corresponding renilla luciferase activities (means  $\pm$ S.E.M.).

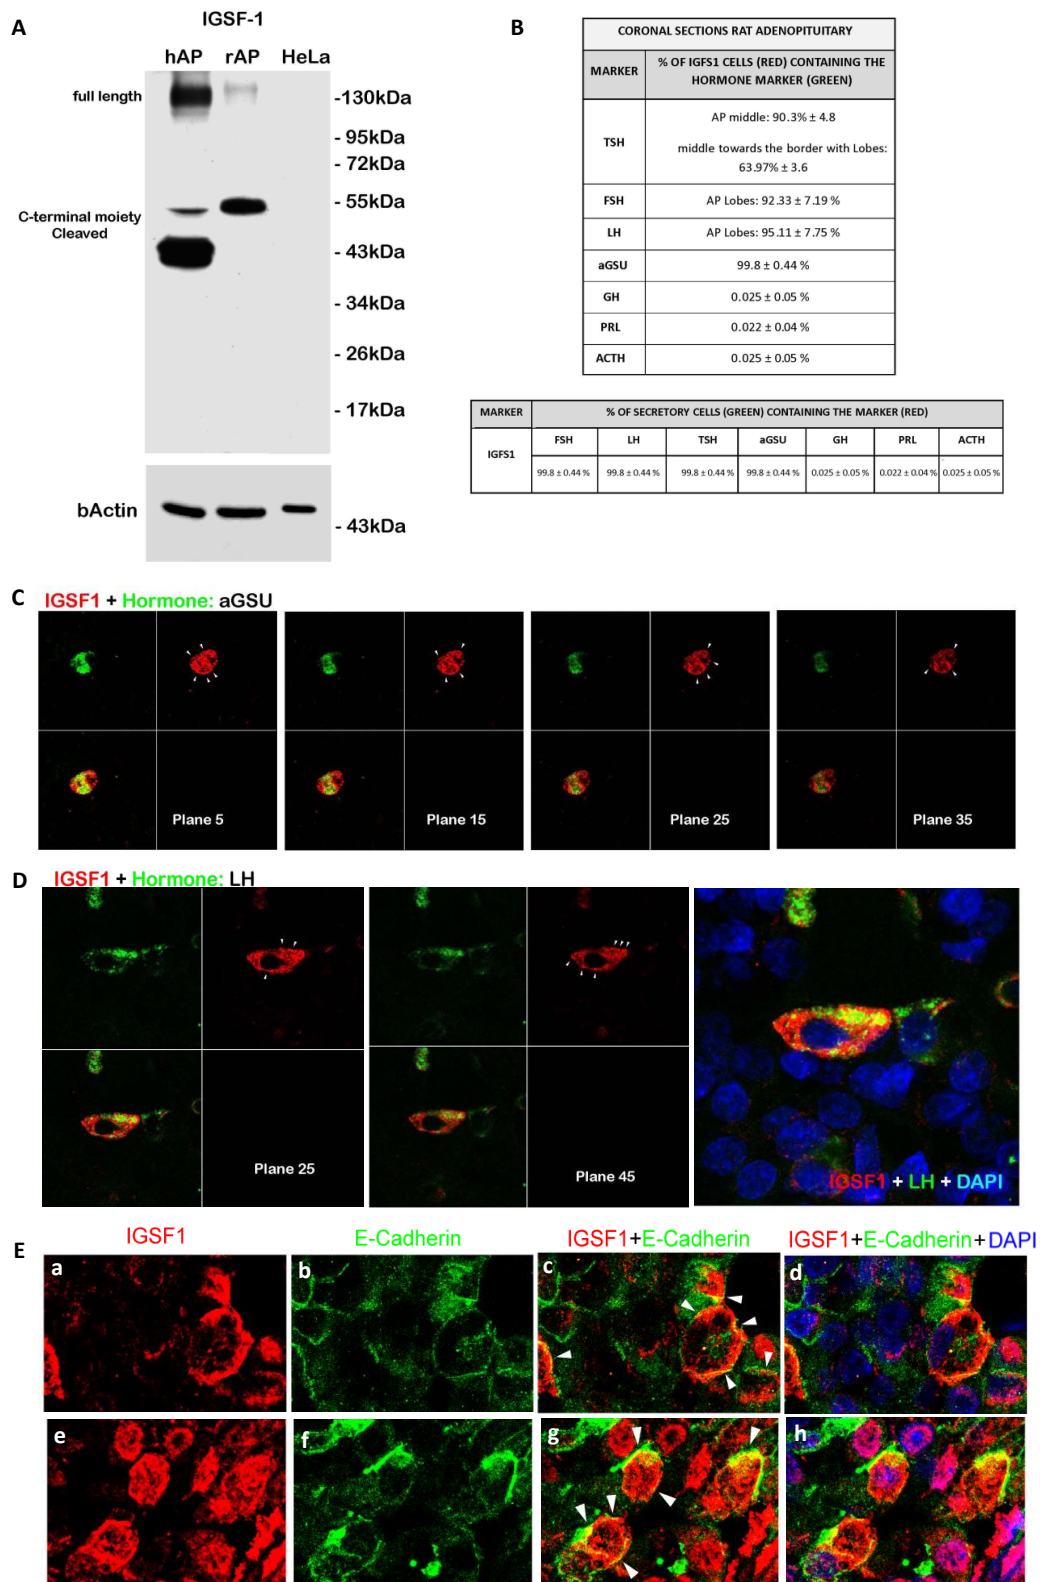

**Supplemental Figure 4. IGSF1 is a pituitary protein characteristic of thyrotropes and gonadotropes residing in the plasma membrane. A)** Western blot of human and rat adenohypophysis (AP) using an antibody raised against the N-terminal moiety. The human HeLa cell line has been used as a human negative control. Full length IGSF1 is a protein >145 kDa. Cleaved IGSF1 C-terminal half (~55 kDa) is further processed in humans (~45 kDa). **B)** Quantification of the confocal studies co-localizing IGSF1 and the pituitary hormones. Data have been expressed in either or two ways: taking IGSF1 as the principal marker and evaluating the percentage of cells co-staining for a given hormone (above); or quantitating how many endocrine cells of a given type co-expressed IGSF1 (below). **C-D)** 4x zooming of isolated co-stained cells and IGSF1 subcellular localization. White arrowheads show plasma membrane reinforcement of IGSF1 staining at the periphery of the hormone staining through the different planes, in an aGSU+ve cell (C) and in a LH+ve cell (D). Planes were taken every 70 nm. **E)** Confirmation of IGSF1 subcellular localization through co-localization of IGSF1 (a, e, red) and E-Cadherin (b, f, green), a plasma membrane marker, clearly showing yellow co-staining at the cell membrane (c, g, white arrowheads,). Co-localization of IGSF1 and E-Cadherin plus DAPI-stained cell nuclei (d, h).



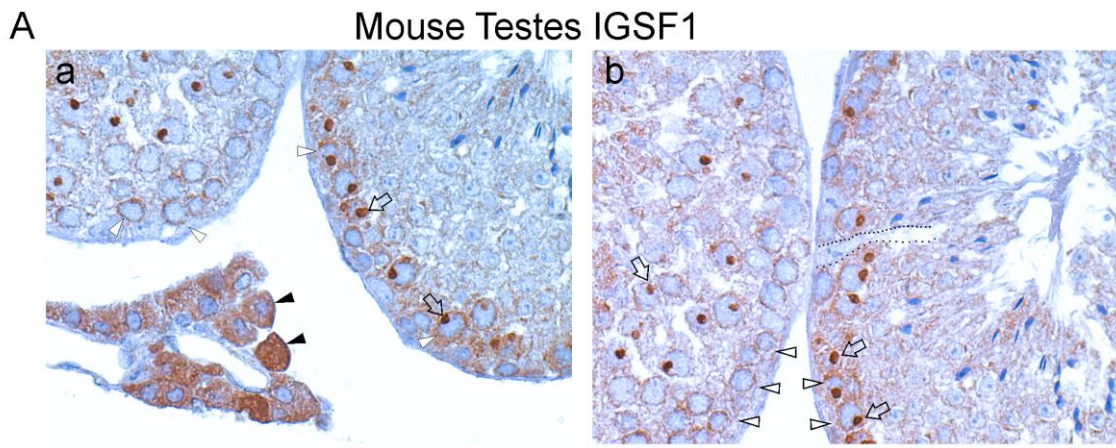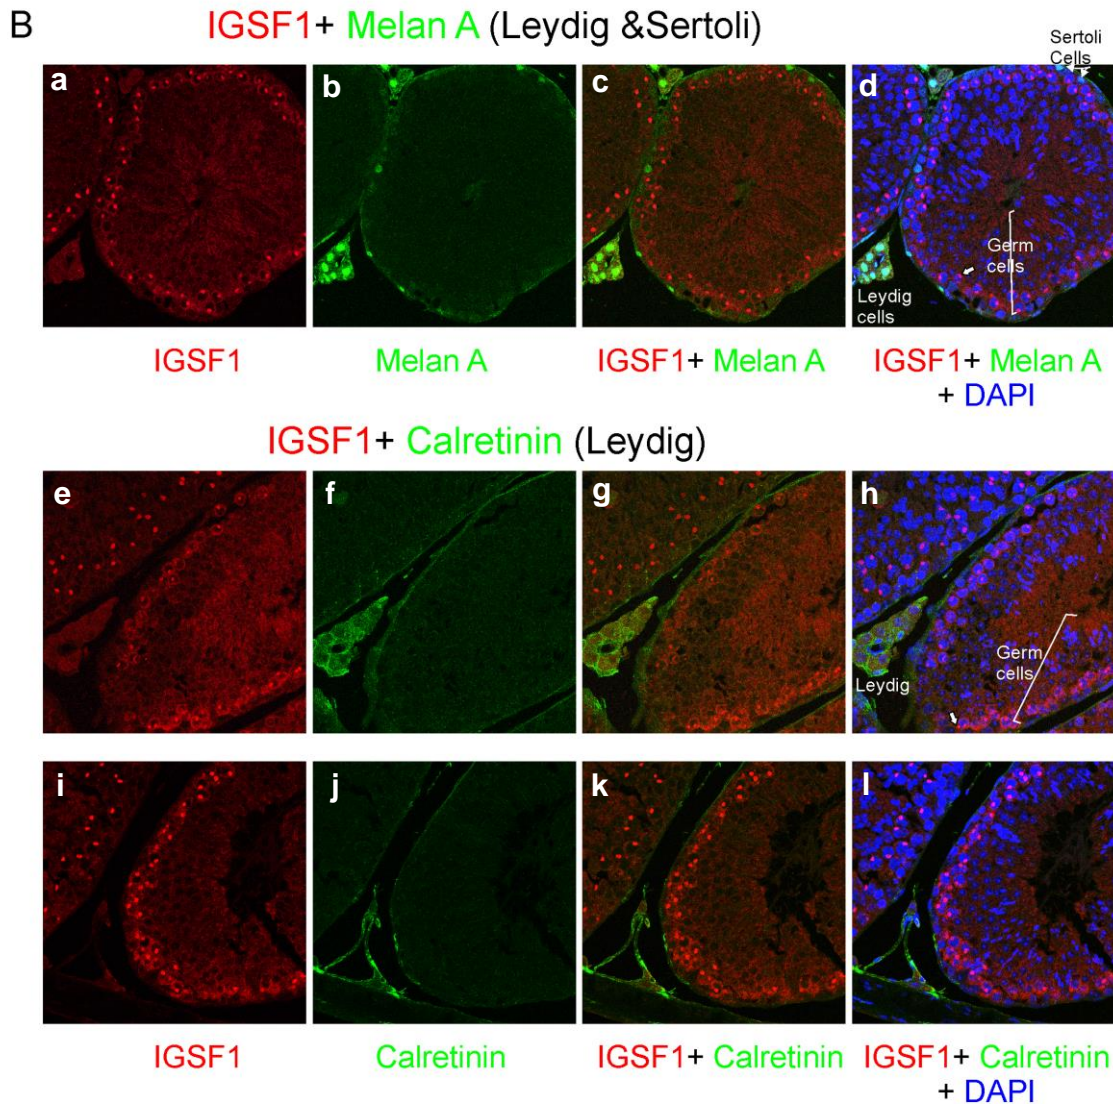

**Supplemental Figure 5. IGSF1 staining of adult mouse testes reveals strong staining in cell granules that is not seen in human stainings. A)** Immunohistochemistry of *Igsf1* shows cells at the interstitial space (**a**, black arrowheads) but also within seminiferous tubules, with reinforced staining in the basal layer (**a**, **b**, white arrowheads). Sertoli cells seem not stained by *Igsf1*, as illustrated by the dotted-lined highlighted cell with its characteristic prominent nucleolus (**b**). *Igsf1* stains peri-nuclear granules of the germ epithelium (thick open arrows), predominantly at the spermatogonia (**a**, **b**). **B)** Immunofluorescent colocalization of *Igsf1* with Melan A (Leydig and Sertoli cell marker) and Calretinin (specific Leydig marker). *Igsf1* (**a**, **e**, **i**, red) is present within seminiferous tubules but also at the interstitial space. As expected, Melan A stains Leydig and some Sertoli cells (**b**, green), but does not co-localize with *Igsf1* within seminiferous tubules (**c**, **d**). Calretinin-*Igsf1* double fluorescence confirms the presence of both proteins only in Leydig cells (**g**, **h**, **k**, **l**). Within tubules, *Igsf1* staining is reinforced at the basal layer with marked granules, also detected by immunohistochemistry, but staining is present all-through the germ cell epithelium width (**g**, **h**, **k**, **l**).

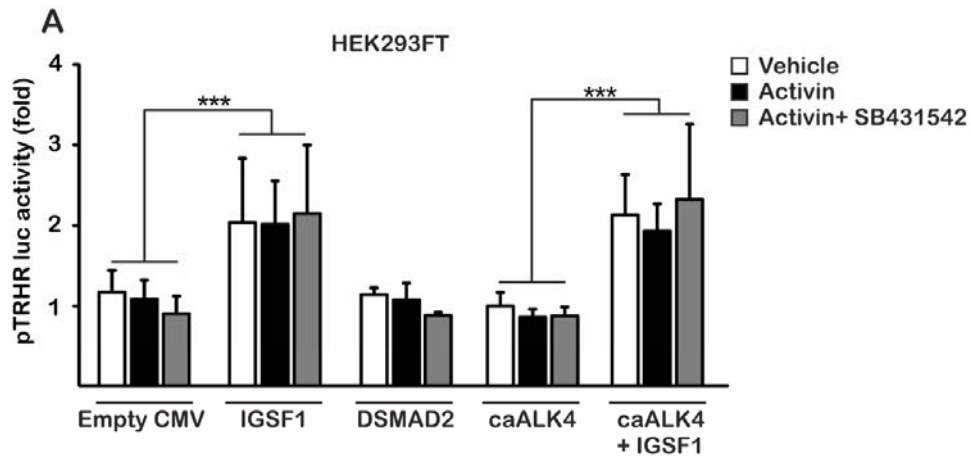

**Supplemental Figure 6. Activin does not alter the expression of the TRHR promoter nor affect the positive effect of IGSF1.** Transfection of IGSF1 duplicate the activity of the human TRHR promoter. Addition of Activin does not affect the basal activity nor the IGSF1 induction, and consequently the receptor inhibitor SB431542 has no effect. The promoter is affected neither by a SMAD2 dominant negative (DSMAD2) nor by an Activin receptor constitutively activated mutant (caALK4).



A

Immunofluorescence controls: Parallel stainings

1<sup>st</sup> Ab:

Rabbit anti-IGSF1  
Goat anti-TSHb

None  
Goat anti-TSHb

None  
None

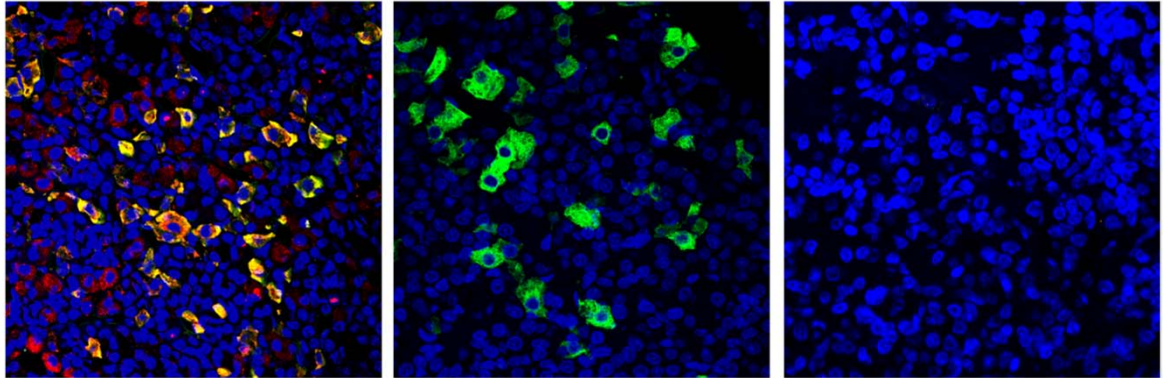

2<sup>nd</sup> Ab all three:

Donkey anti-rabbit Cy3  
Donkey anti-goat 488  
DAPI

B

Immunohistochemistry :

Control w/o 1<sup>st</sup> Ab, with all other Dako reagents including 2<sup>nd</sup> Ab, counterstained with hematoxylin

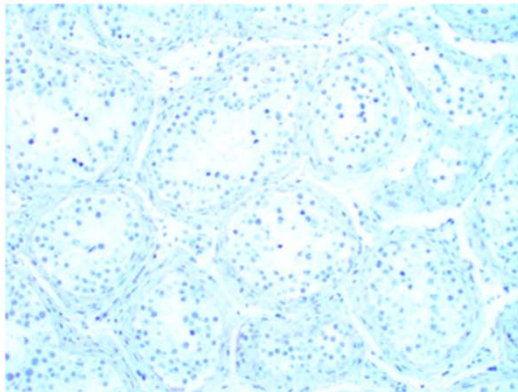

Testis 75 y.o. 100x

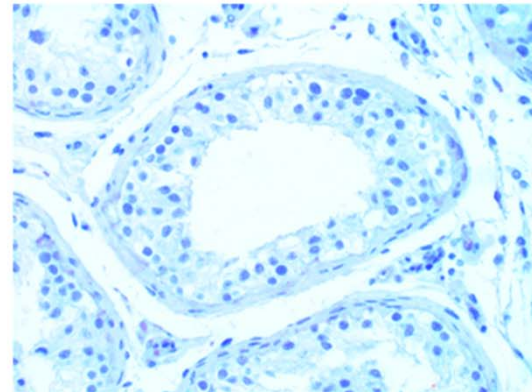

Testis 42 y.o. 200x

### Supplemental Figure 7: Controls of immunostainings

- A) Parallel staining of rat pituitary sections for double immunofluorescence with rabbit anti-IGSF1 plus goat-antiTSH (left), omitting the IGSF1 antibody (centre), or with no primary antibody (right). The secondary antibody for all three sections were: donkey anti-rabbit Cy3 (red cells, IGSF1+), donkey anti-goat 488 (green cells, TSH+) together with DAPI.
- B) Immunohistochemistry performed in sections of human testes as in Figure 3 but omitting the primary antibody, and also counterstained with hematoxylin.



| Hormone Assay   | Source                                                         | Sensitivity | Range of Detection | Standard calibration                   |
|-----------------|----------------------------------------------------------------|-------------|--------------------|----------------------------------------|
| Human TSH       | Immulin 2000 analyzer (Siemens Healthcare Diagnostics)         | 0.001 mIU/L | 0.01 -100 mIU/L    | NCCLS document EP17                    |
| FT4             | Vitros ECI immunoanalyzer                                      | 0.24 pmol/L | 0.88-90 pmol/L     | NCCLS document EP17                    |
| FT3             | Vitros ECI immunoanalyzer                                      | 0.18 pmol/L | 0.77-35 pmol/L     | NCCLS document EP17                    |
| Human FSH       | Immulin 2000 analyzer (Siemens Healthcare Diagnostics)         | 0.1 mIU/L   | up to 170 mIU/mL   | WHO 2nd IRP 78/549                     |
| Human LH        | Immulin 2000 analyzer (Siemens Healthcare Diagnostics)         | 0.05 mIU/mL | up to 200 mIU/mL   | WHO 1st IRP 68/40 and 2nd IS 80/552    |
| Testosterone    | Coat-A-Count radioimmunoassay (Siemens Healthcare Diagnostics) | 0.5 nmol/L  | 0.7 and 55 nmol/L  | $\Delta$ 4-Androsten-17Beta-ol-3-one   |
| Human Inhibin B | OBI-DSL (Beckman Coulter)                                      | 7 pg/ml     | 11-900 pg/ml       | Note: 0.5% cross-reaction to Inhibin A |
| Human AMH       | Immunotech SAS                                                 | 0.02 ng/mL  | 0.1-22 ng/mL       | CLSI EP17-A2                           |

**Supplemental Table 1. Analytical limits of detection and dynamic range of the hormone assays**

| 1 <sup>st</sup> Antibody | Source                      | Origin | Dilution |                  |                             |
|--------------------------|-----------------------------|--------|----------|------------------|-----------------------------|
|                          |                             |        | WB       | IF               | Magnetic immunopurification |
| IGSF-1                   | Genetex, GTX112633          | R      | 1:1000   | 1:200, 4°C, o.n. |                             |
| a-Tubulin                | Sigma, T5168                | M      | 1:2500   |                  |                             |
| aGSU (hCG alpha)         | Sunny lab (BM319-MGH2)      | M      |          | 1:100, 4°C, o.n. |                             |
| GH                       | NIDDK, AFP222387790         | Gp     |          | 1:800, R.T., 1h  |                             |
| GH                       | NIDDK, AFPC11981A           | R      |          |                  | 1:25, ice, 30 min.          |
| ACTH                     | Dako, M3501                 | M      |          | 1:100, 4°C, o.n. |                             |
| PRL                      | Biodesign, E30610M          | M      |          | 1:500, 4°C, o.n. |                             |
| Beta-TSH                 | Santa Cruz Biotech, sc-7813 | G      |          | 1:50, 4°C, o.n.  |                             |
| Beta-TSH                 | NIDDK, AFP1274789           | R      |          |                  | 1:12,5, ice, 30 min         |
| Beta-LH                  | Thermo, Ms-9078P1           | M      |          | 1:100, 4°C, o.n. |                             |
| Beta-FSH                 | Zymed, 18-0020              | M      |          | 1:100, 4°C, o.n. |                             |
| Beta-FSH                 | NIDDK, AFP7798-1289         | R      | 1:1000   |                  | 1:12,5, ice, 30 min         |
| Pit-1                    | BD, 610223                  | M      |          | 1:200, 4°C, o.n. |                             |
| Phospho-SMAD2 Ser465-467 | Cell Signaling, 3108        | R      | 1:1000   |                  |                             |
| SMAD2/3                  | Santa Cruz Biotech, sc-8332 | R      | 1:1000   |                  |                             |

| 2 <sup>nd</sup> Antibody                                                                   | Company                         | Origin | Dilution         |
|--------------------------------------------------------------------------------------------|---------------------------------|--------|------------------|
| <b>Anti-rabbit IgG-HRP</b>                                                                 | GE Healthcare<br>NA934V         | D      | 1:5000           |
| <b>Anti-mouse IgG/HRP</b>                                                                  | DAKO, P0260                     | R      | 1:5000           |
| <b>Anti-mouse Alexa 488</b><br>Donkey Anti-Mouse IgG (H+L) Alexa Fluor 488                 | Molecular Probes,<br>A-21202    | D      | 1:400            |
| <b>Anti-rabbit-Fab-Cy3</b><br>Goat Anti-Rabbit IgG, F(ab') <sub>2</sub> Fragment Specific) | Jackson,<br>111-166-047         | G      | 1:600            |
| <b>Anti-Guinea pig-IgG-Alexa F488</b><br>Goat Anti-Guinea Pig IgG Alexa Fluor 488          | Molecular Probes,<br>A-11073    | G      | 1:1500           |
| <b>Anti-goat-Fab-IgG Cy2</b><br>Donkey Anti-goat F(ab') <sub>2</sub> IgG (H+L) Cy2         | Jackson,<br>705-226-147         | D      | 1:600            |
| <b>Anti-Rabbit IgG MACS MicroBeads</b>                                                     | Miltenyi Biotec,<br>130-048-602 | G      | 1:4, ice, 15 min |

**Supplemental Table 2. Antibodies and kits used in the experiments and its dilutions. (M=mouse; R=rabbit; G=Goat; Gp=guinea pig; D=Donkey)**
